# Supplementary material for: Personality Consistency in Dogs: A Meta-Analysis
Source: PLoS One. 2013 Jan 23;8(1):e54907. doi: 10.1371/journal.pone.0054907 (PMC3553070; doi:10.1371/journal.pone.0054907)
Supplement: Supporting Information S1 — Results of Moderator Analysis using fixed effects models. (DOC) [file pone.0054907.s002.doc]

Supporting information

**Table S1. Results of Moderator Analysis using fixed effects models.**

| *Moderators* |  | *k* | *r* | *Lower* | *Higher* |
| --- | --- | --- | --- | --- | --- |
| **Jones and Gosling** | |  |  |  |  |
| Activity | | 12 | 0.32** | 0.30 | 0.34 |
| Aggression | | 8 | 0.26** | 0.24 | 0.28 |
| Fearfulness | | 22 | 0.26** | 0.25 | 0.28 |
| Responsiveness to Training | | 11 | 0.22** | 0.20 | 0.24 |
| Sociability | | 9 | 0.28** | 0.26 | 0.32 |
| Submissiveness | | 4 | 0.42** | 0.36 | 0.48 |
|  | |  |  |  |  |
| **Age at First Test** | |  |  |  |  |
|  | |  |  |  |  |
| Puppy | | 14 | 0.32** | 0.31 | 0.33 |
| Adult | | 17 | 0.26** | 0.25 | 0.27 |
|  | |  |  |  |  |
| **Role of Dog** | |  |  |  |  |
|  | |  |  |  |  |
| Companion | | 15 | 0.27** | 0.26 | 0.28 |
| Working | | 10 | 0.34** | 0.33 | 0.35 |
|  | |  |  |  |  |
| **Measurement Method** | |  |  |  |  |
|  | |  |  |  |  |
| Codings | | 8 | 0.29** | 0.28 | 0.31 |
| Ratings | | 21 | 0.29** | 0.28 | 0.30 |
|  | |  |  |  |  |
| **Measurement** | |  |  |  |  |
|  | |  |  |  |  |
| Single | | 16 | 0.34** | 0.33 | 0.35 |
| Aggregate | | 20 | 0.34** | 0.33 | 0.35 |
|  | |  |  |  |  |
| **Test Two** | |  |  |  |  |
|  | |  |  |  |  |
| Same | | 22 | 0.36** | 0.35 | 0.37 |
| Different | | 16 | 0.14** | 0.13 | 0.15 |
| **Overall Estimate** | | 31 | 0.29** | 0.29 | 0.30 |

+p < 0.10, *P < 0.05, **p < 0.01

**Table S2. Contrasts (Q-values) for Jones and Gosling (2005) personality dimensions in puppies using fixed effects models.**

|  | Aggression | | Fearfulness | Responsiveness | Sociability | Submissiveness |  |
| --- | --- | --- | --- | --- | --- | --- | --- |
| Activity | | 15.89** | 14.67** | 42.47** | 3.51+ | 8.57** |  |
| Aggression | |  | 0.39 | 7.94** | 2.39 | 21.60** |  |
| Fearfulness | |  |  | 14.52** | 1.41 | 20.33** |  |
| Responsiveness to Training | |  |  |  | 14.38** | 32.41** |  |
| Sociability | |  |  |  |  | 14.27** |  |

+*p* < .10, **p* < .05, ** *p* < .01, all values are Q values

**Table S3. Interaction of personality factors and age of dog using fixed effects models.**

|  |  |  | 95% Confidence Interval | |
| --- | --- | --- | --- | --- |
|  | *k* | *r* | *Low Estimate* | *High Estimate* |
| **Puppy** |  |  |  |  |
|  |  |  |  |  |
| Activity | 7 | 0.34** | 0.31 | 0.37 |
| Aggression | 2 | 0.55** | 0.51 | 0.59 |
| Fearfulness | 10 | 0.29** | 0.28 | 0.31 |
| Responsiveness to Training | 6 | 0.19** | 0.17 | 0.21 |
| Sociability | 4 | 0.38** | 0.35 | 0.42 |
| Submissiveness | 3 | 0.43** | 0.36 | 0.49 |
|  |  |  |  |  |
| **Adult** |  |  |  |  |
|  |  |  |  |  |
| Activity | 7 | 0.29** | 0.25 | 0.33 |
| Aggression | 6 | 0.20** | 0.18 | 0.22 |
| Fearfulness | 13 | 0.18** | 0.15 | 0.21 |
| Responsiveness to Training | 4 | 0.29** | 0.25 | 0.32 |
| Sociability | 6 | 0.15** | 0.10 | 0.19 |
| Submissiveness | 1 | -0.13 | -0.73 | 0.59 |

+p < 0.10, *p < 0.05, **p < 0.01

**Table S4. Contrasts (Q-values) for Jones and Gosling (2005) personality dimensions and age interaction using fixed effects models.**

|  | |  | Aggression | Fearfulness | Responsiveness | Sociability | Submissiveness |  |
| --- | --- | --- | --- | --- | --- | --- | --- | --- |
| Puppy |  | |  |  |  |  |  |  |
|  | Activity | | 67.87** | 6.28** | 56.49** | 3.61+ | 5.92* |  |
|  | Aggression | |  | 116.22** | 195.84** | 39.64** | 12.10** |  |
|  | Fearfulness | |  |  | 49.15** | 19.23** | 14.45** |  |
|  | Responsiveness to Training | |  |  |  | 75.36** | 40.89** |  |
|  | Sociability | |  |  |  |  | 1.42 |  |
| Adult |  | |  |  |  |  |  |  |
|  | Activity | | 16.84** | 21.78** | 0.03 | 23.04** | 1.08 |  |
|  | Aggression | |  | 1.41 | 15.64** | 4.17* | 0.65 |  |
|  | Fearfulness | |  |  | 20.56** | 1.22 | 0.56 |  |
|  | Responsiveness to Training | |  |  |  | 21.92** | 1.05 |  |
|  | Sociability | |  |  |  |  | 0.45 |  |

+*p* < .10, **p* < .05, ** *p* < .01, all values are Q values

**Table S5. Fixed effects meta-regression for ‘time interval between tests’ moderator.**

| *Variable* | *B* | *P* |
| --- | --- | --- |
| Interval | -0.003 | <0.001 |
| Regression constant | 0.41 |  |
| Overall model | Q(1) = 629.20 |  |
| Residual | Q(818) = 5833.59 |  |
| Total | Q(819) = 6522.80 |  |
| R2 = 0.11 |  |  |
